# Supplementary material for: Meta-analysis of Transcatheter Edge-to-Edge Repair for Atrial Functional Mitral Regurgitation
Source: PubMed Central journal article supplement — J Soc Cardiovasc Angiogr Interv. 2023 Jun 23;2(5):101050. doi: 10.1016/j.jscai.2023.101050 (PMC11308071; doi:10.1016/j.jscai.2023.101050), 2023-06-23
Supplement: mmc1.pdf [file mmc1.pdf]

Supplementary Table 1: Definition of aFMR across the different studies.

| Study, year                   | Study design                 | Definition                                                                                                                                                                                                                                 |
|-------------------------------|------------------------------|--------------------------------------------------------------------------------------------------------------------------------------------------------------------------------------------------------------------------------------------|
| <b>Yoon et al. 2022</b>       | retrospective, single center | FMR with no or mild LV remodeling but moderate or severe LA dilatation                                                                                                                                                                     |
| <b>Tanaka et al. 2022</b>     | retrospective, single center | 1. Normal mitral leaflets; 2. LVEF >50%; 3. Absence of LV enlargement and segmental abnormality.                                                                                                                                           |
| <b>Sodhi et al. 2022</b>      | prospective, multicenter     | 1. LVEF ≥ 45%, 2. Normal MV leaflets, 3. History of AF with LA or mitral annular enlargement (LA volume index >34 mL/m <sup>2</sup> )                                                                                                      |
| <b>Simard et al. 2022</b>     | retrospective, single center | 1. MR ≥ 2+ ;2. LVEF ≥ 50%; 3. Severe LA enlargement (≥48 ml/m <sup>2</sup> )                                                                                                                                                               |
| <b>Shiota et al. 2021</b>     | retrospective, single center | 1. LVEF ≥50% without LV wall motion abnormality 2. LV end-diastolic diameter (LVEDD) <55mm; 3. Permanent AF rhythm                                                                                                                         |
| <b>Rubio et al. 2022</b>      | retrospective, multicenter   | AF and FMR without structural leaflets abnormalities and with HF with preserved LVEF                                                                                                                                                       |
| <b>Rottlander et al. 2022</b> | retrospective, single center | 1. FMR ≥ 3+; 2. LVEF ≥ 50%; 3. LVEDD ≤ 55 mm; 4. HFpEF (NT-proBNP ≥ 125 pg/ml, LA dilation ≥ 34 ml/m <sup>2</sup> , echocardiographic signs of diastolic dysfunction, e.g., E/e' ≥ 13); 5. No regional wall motion abnormalities of the LV |
| <b>Petrescu et al 2021</b>    | retrospective, single center | FMR with 1. Relevant LA dilatation, 2. No LV systolic dysfunction or dilatation, 3. No ischemic etiology of FMR                                                                                                                            |
| <b>Doldi et al. 2022</b>      | retrospective, multicenter   | LVEF ≥50% without any regional wall motion abnormalities, Carpentier type I leaflet motion, and dilated left atria.                                                                                                                        |
| <b>Claeys et al. 2021</b>     | retrospective, multicenter   | FMR in the presence of LVEF ≥50% and LAVI >34 ml/m <sup>2</sup> (or anterior-posterior left anterior dimension index >23 cm/m <sup>2</sup> )                                                                                               |
| <b>Gonzalez et al. 2021</b>   | retrospective, multicenter   | 1. Normal MV leaflets; 2. History of AF; 3. Normal LV systolic function with LVEF > 50% and no segmental abnormalities                                                                                                                     |

Abbreviations:

AF: Atrial fibrillation; FMR: Functional mitral regurgitation; HFpEF: Heart failure with preserved ejection fraction; LA: Left atrium; LAVI: left atrium volume index; LV: Left ventricle; LVEF: Left ventricle ejection fraction; MR: mitral regurgitation; MV: Mitral valve.
